# Supplementary material
Source: PubMed Central journal article supplement (PMC8719451)
Supplement: NIHMS1758798-supplement-Figures_S1-S7.pdf [file NIHMS1758798-supplement-Figures_S1-S7.pdf]

|                | CD8 T E | CD8 T M | CD4 T R/H | NK  | B cells | Mast cells | cDC1 | cDC2 | DC3 | pDC | Mono1 | Mono2 | Mono-like DC | Neutrophils | Mac1 | Mac2 | Non-immune | Total |
|----------------|---------|---------|-----------|-----|---------|------------|------|------|-----|-----|-------|-------|--------------|-------------|------|------|------------|-------|
| D4M.3A-pOVA #1 | 182     | 153     | 125       | 186 | 16      | 57         | 79   | 65   | 14  | 24  | 691   | 37    | 20           | 3           | 1061 | 42   | 577        | 3332  |
| D4M.3A-pOVA #2 | 403     | 161     | 139       | 236 | 19      | 2          | 95   | 124  | 40  | 52  | 1359  | 170   | 24           | 16          | 1548 | 83   | 954        | 5425  |

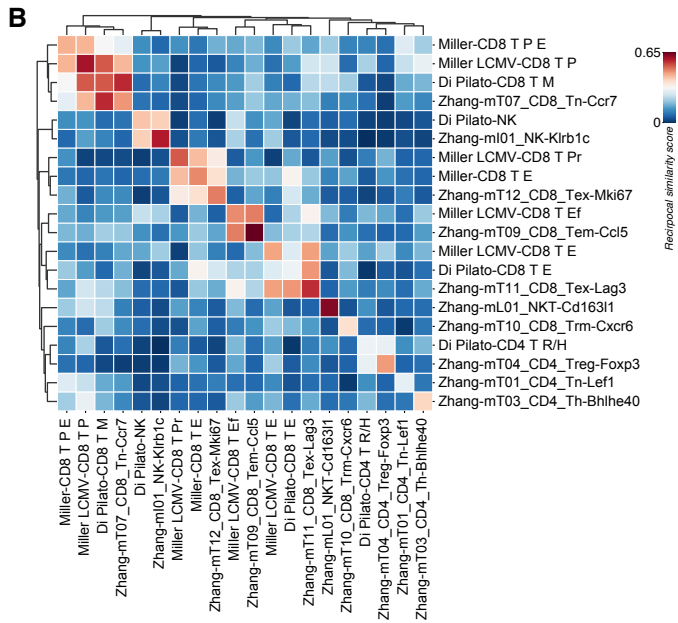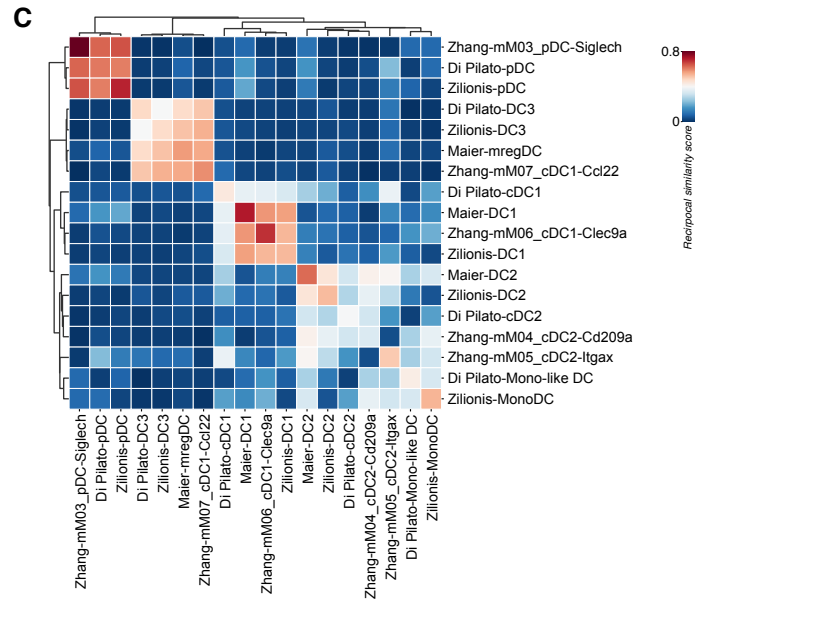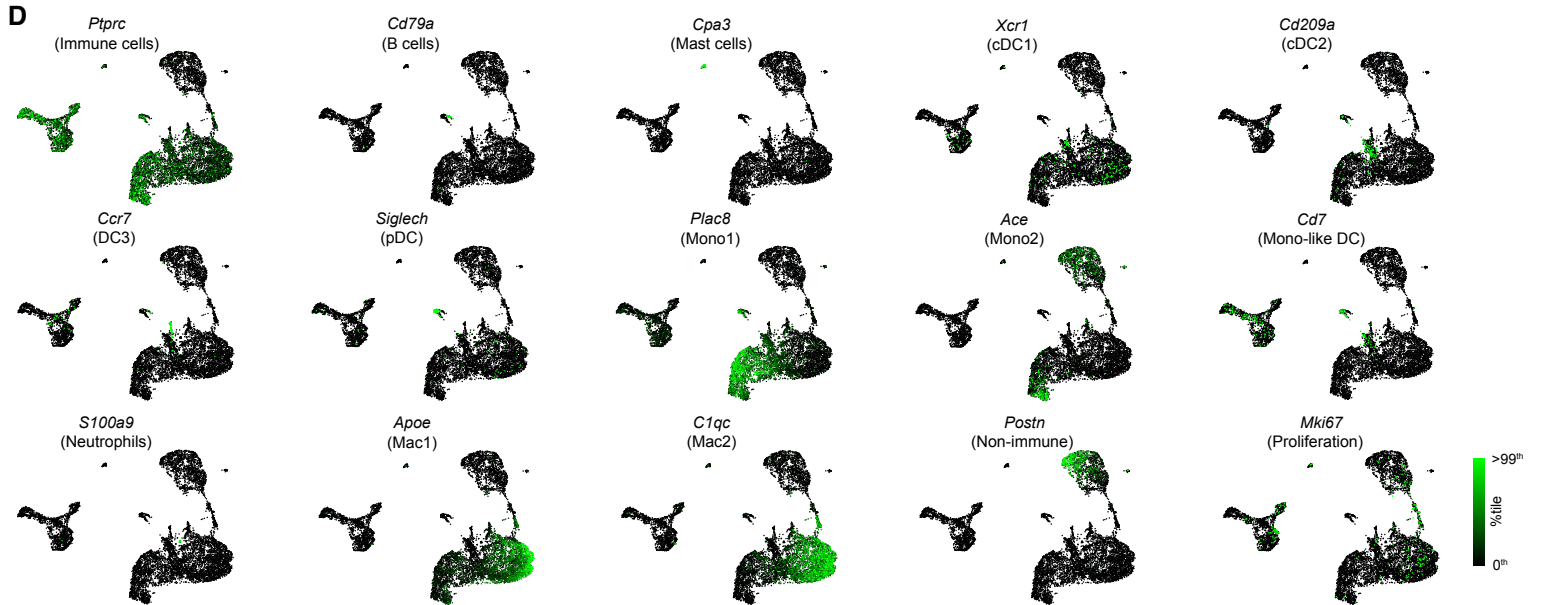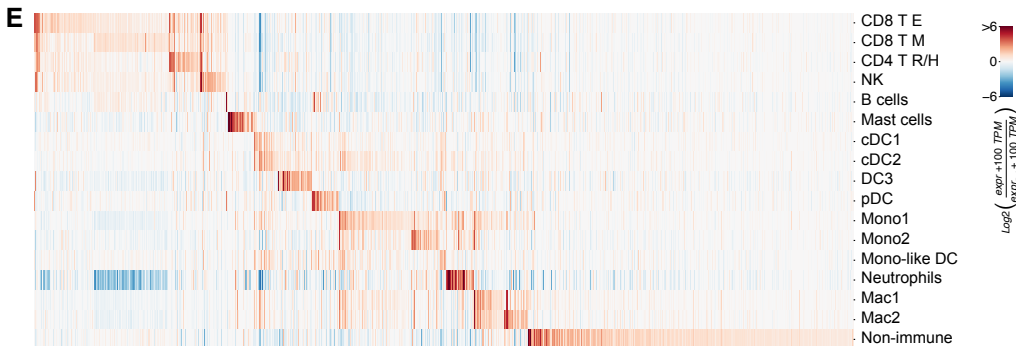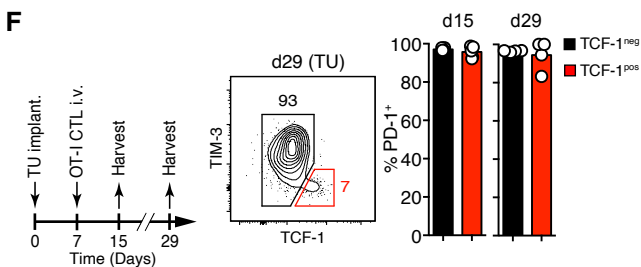

Figure S1

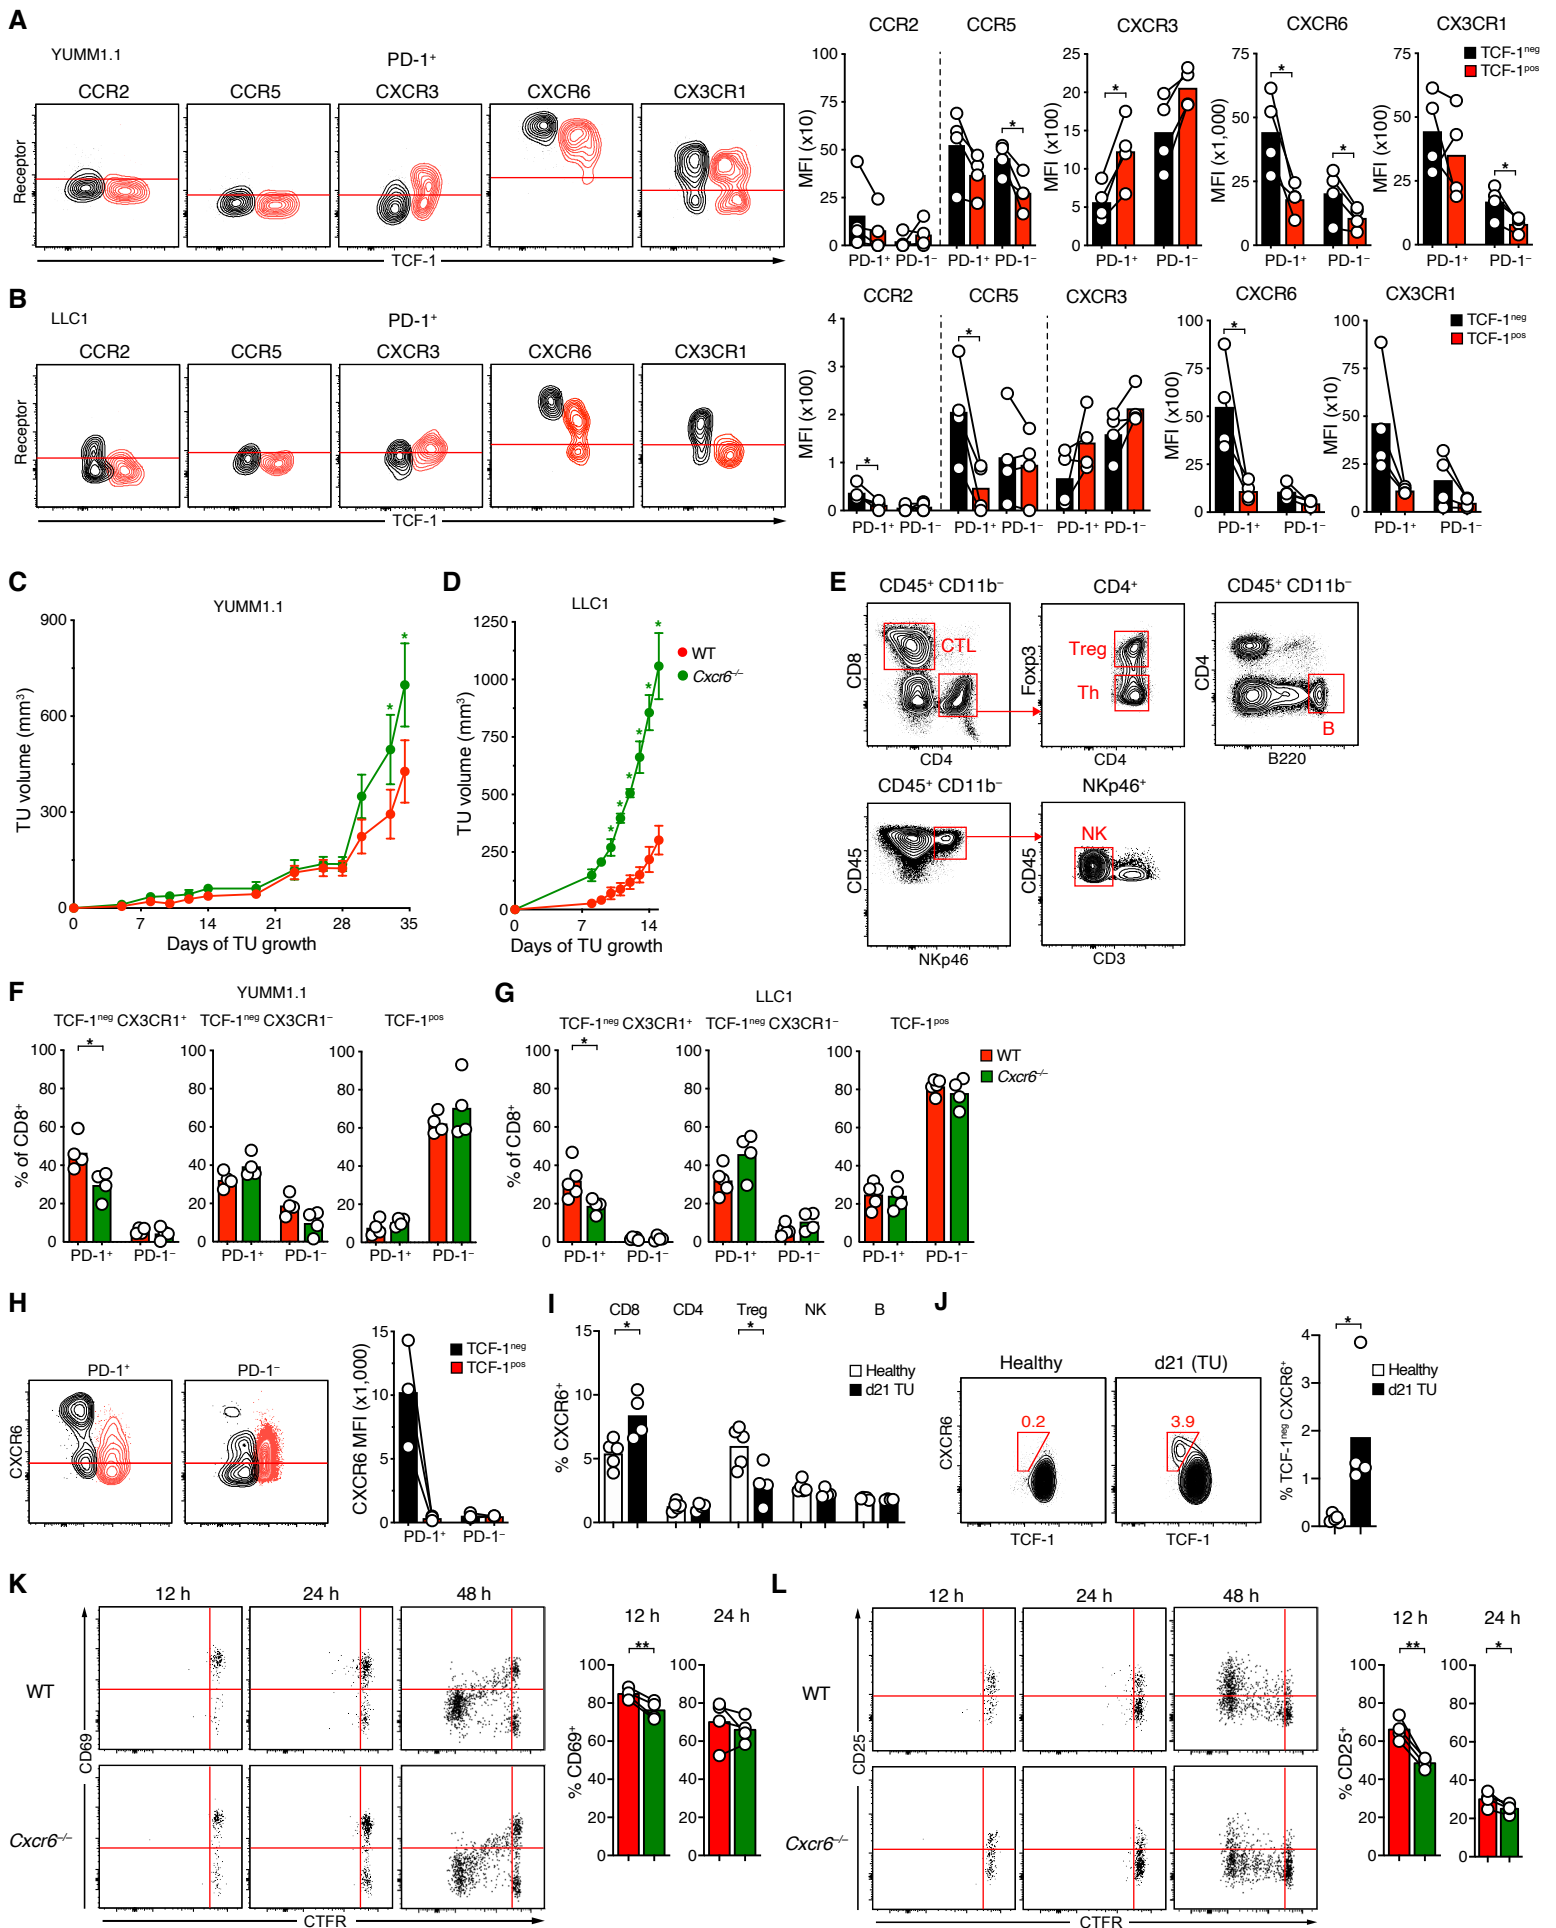

**Figure S2**

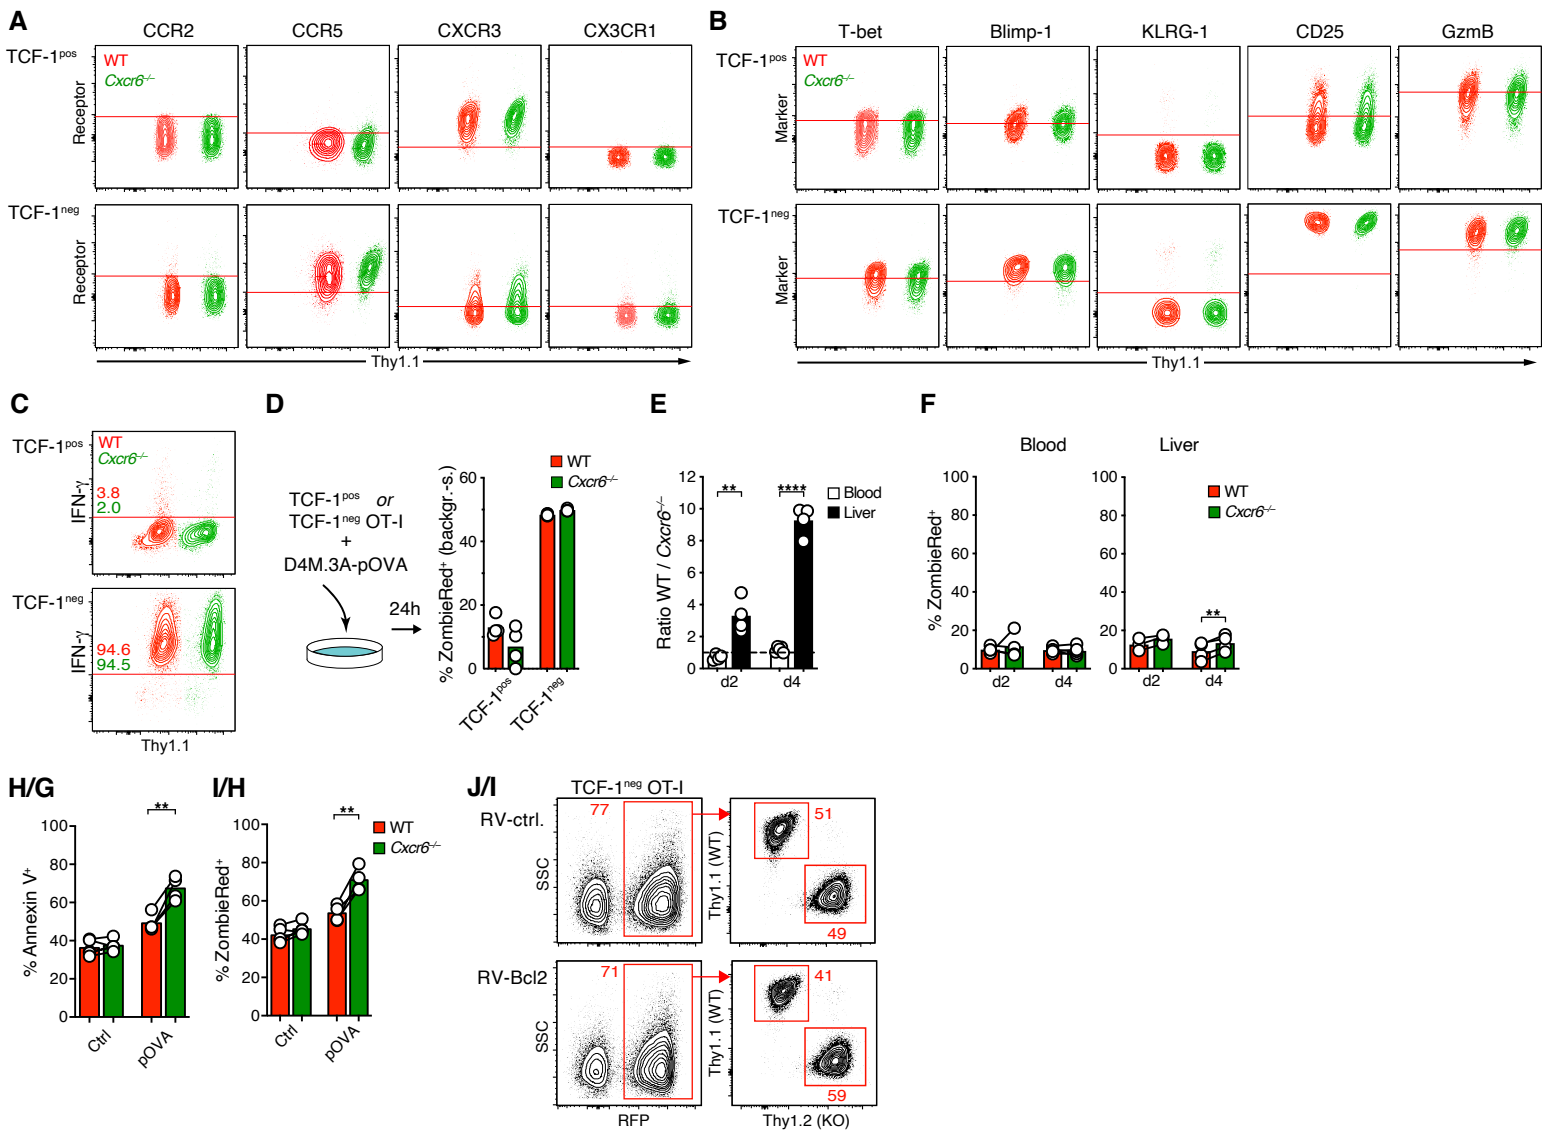

Figure S3

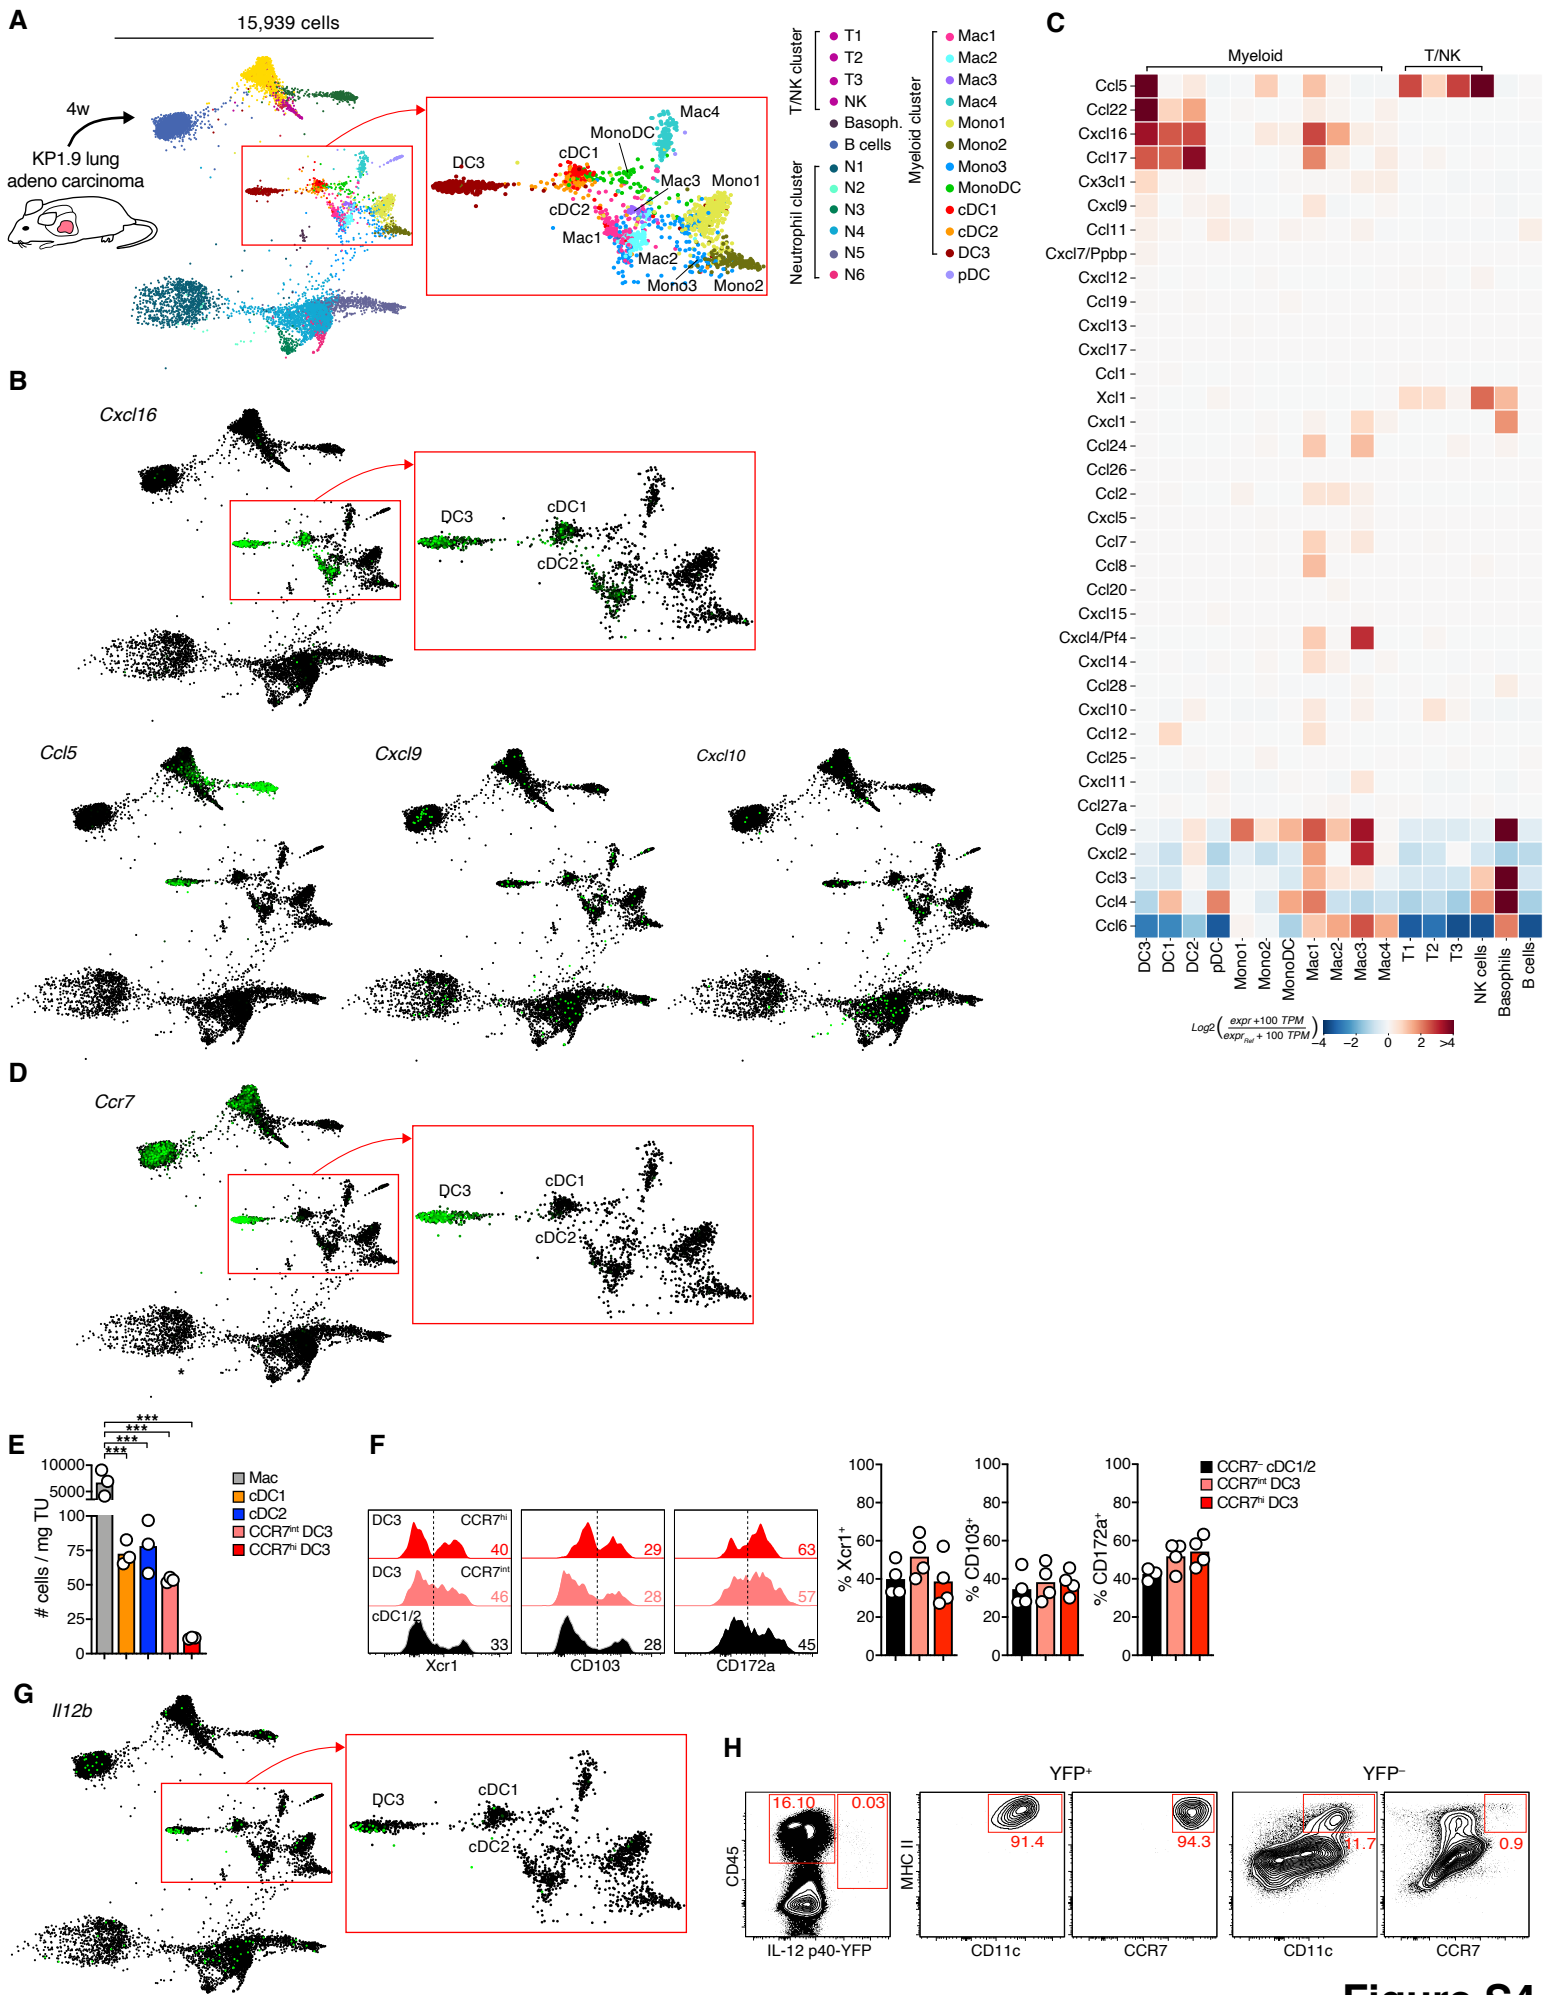

**Figure S4**



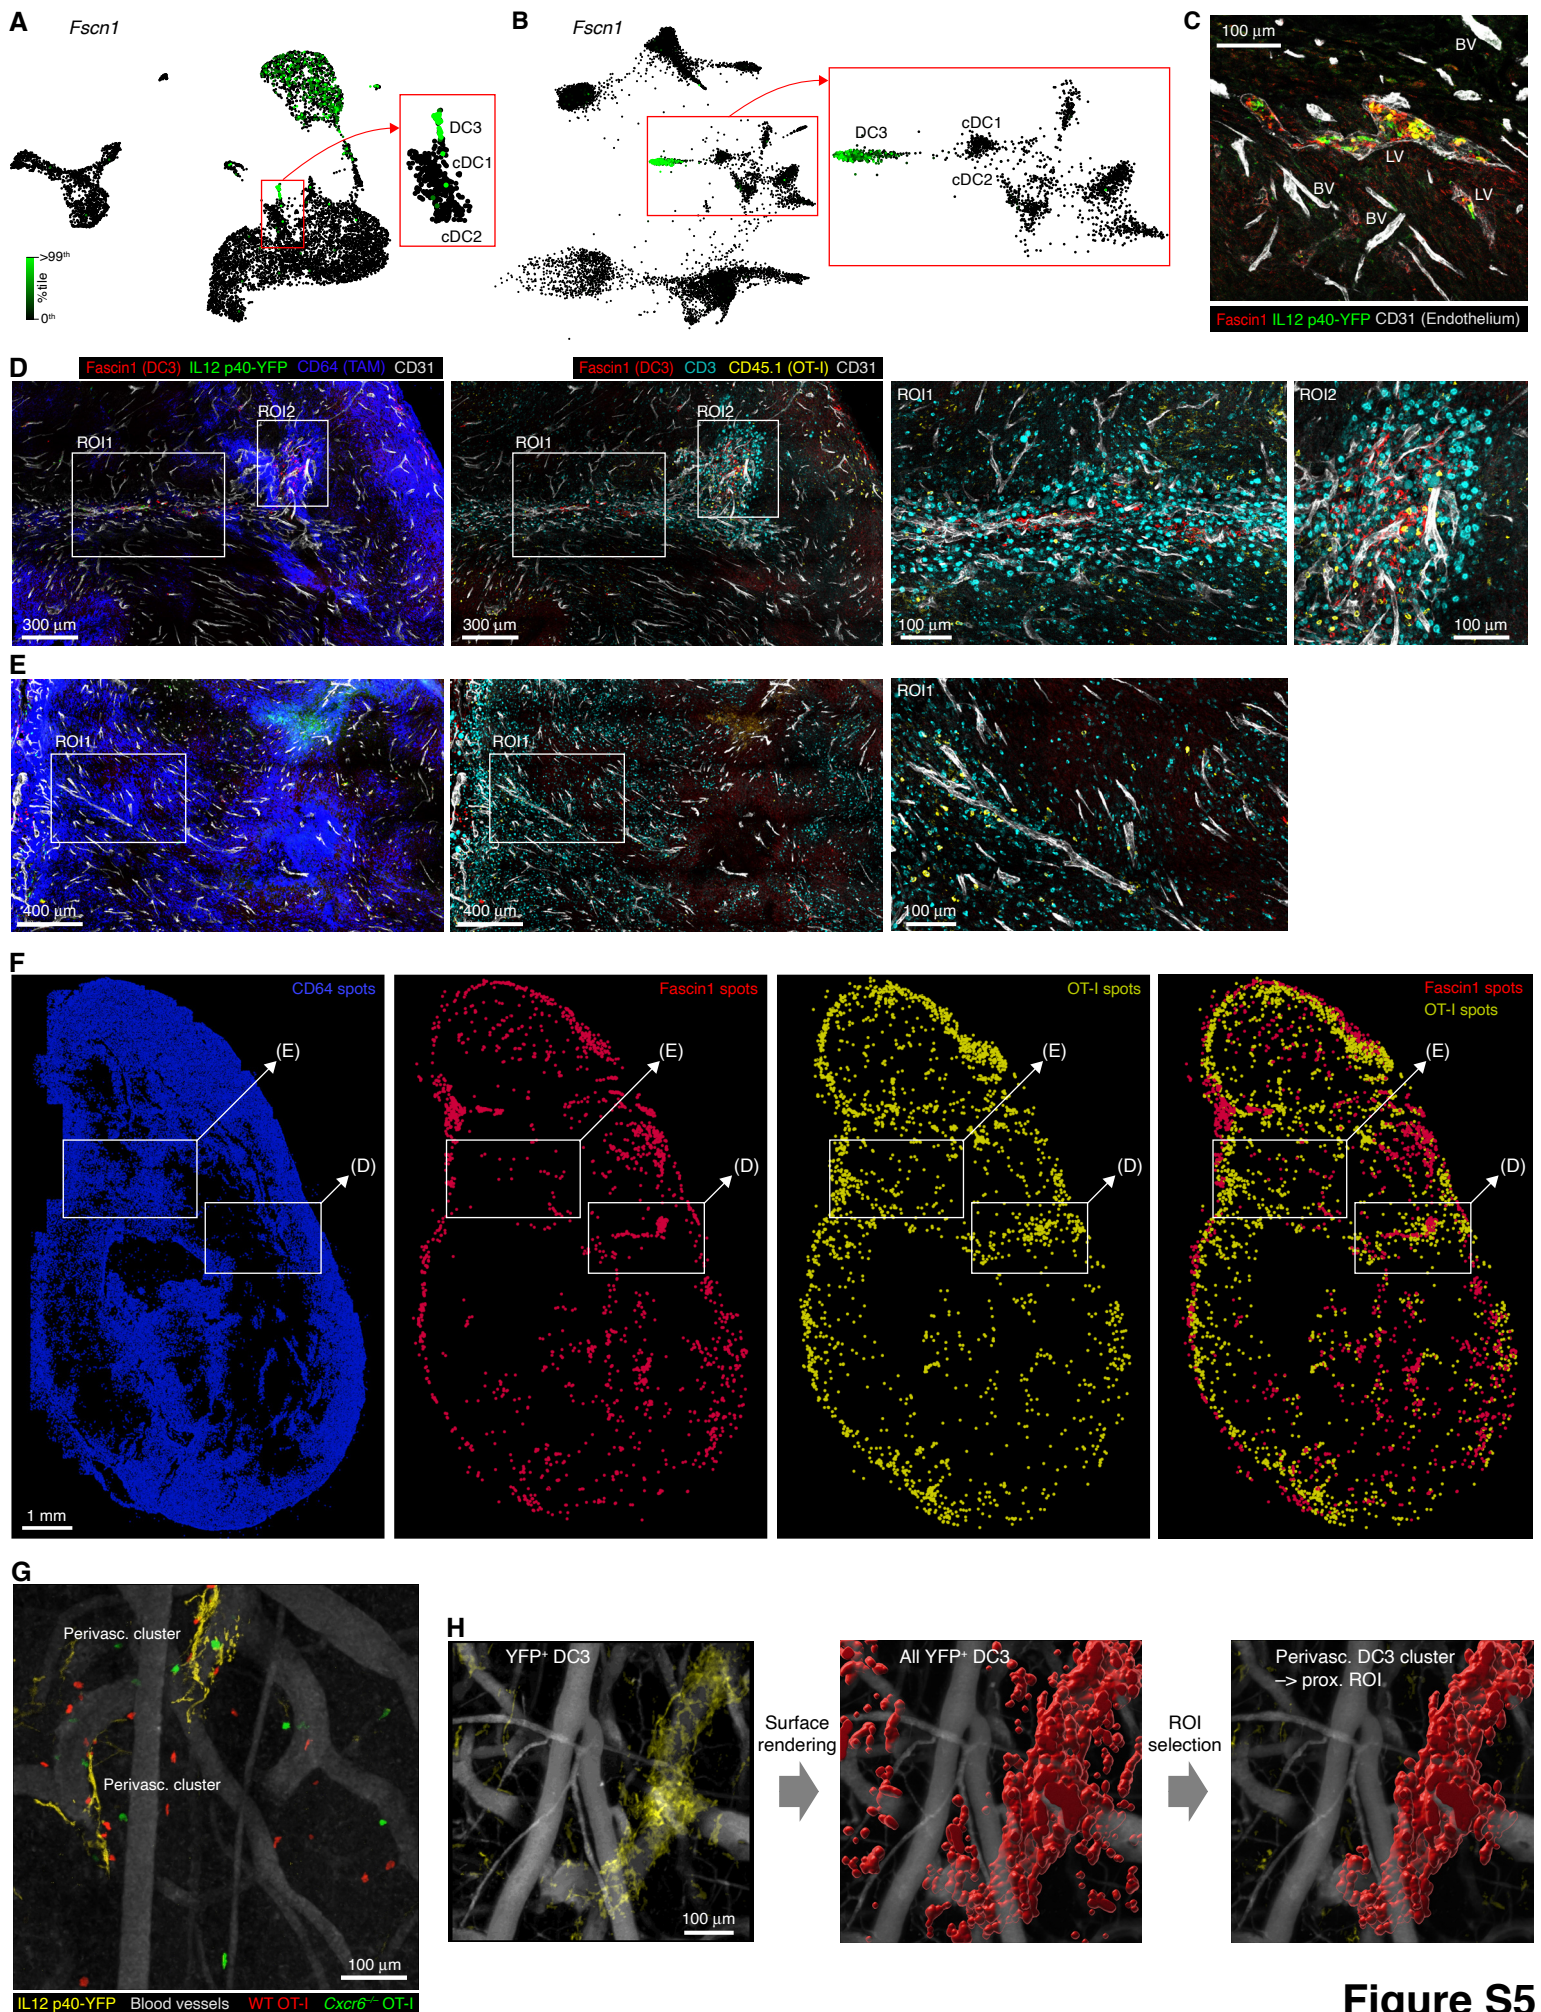

**Figure S5**

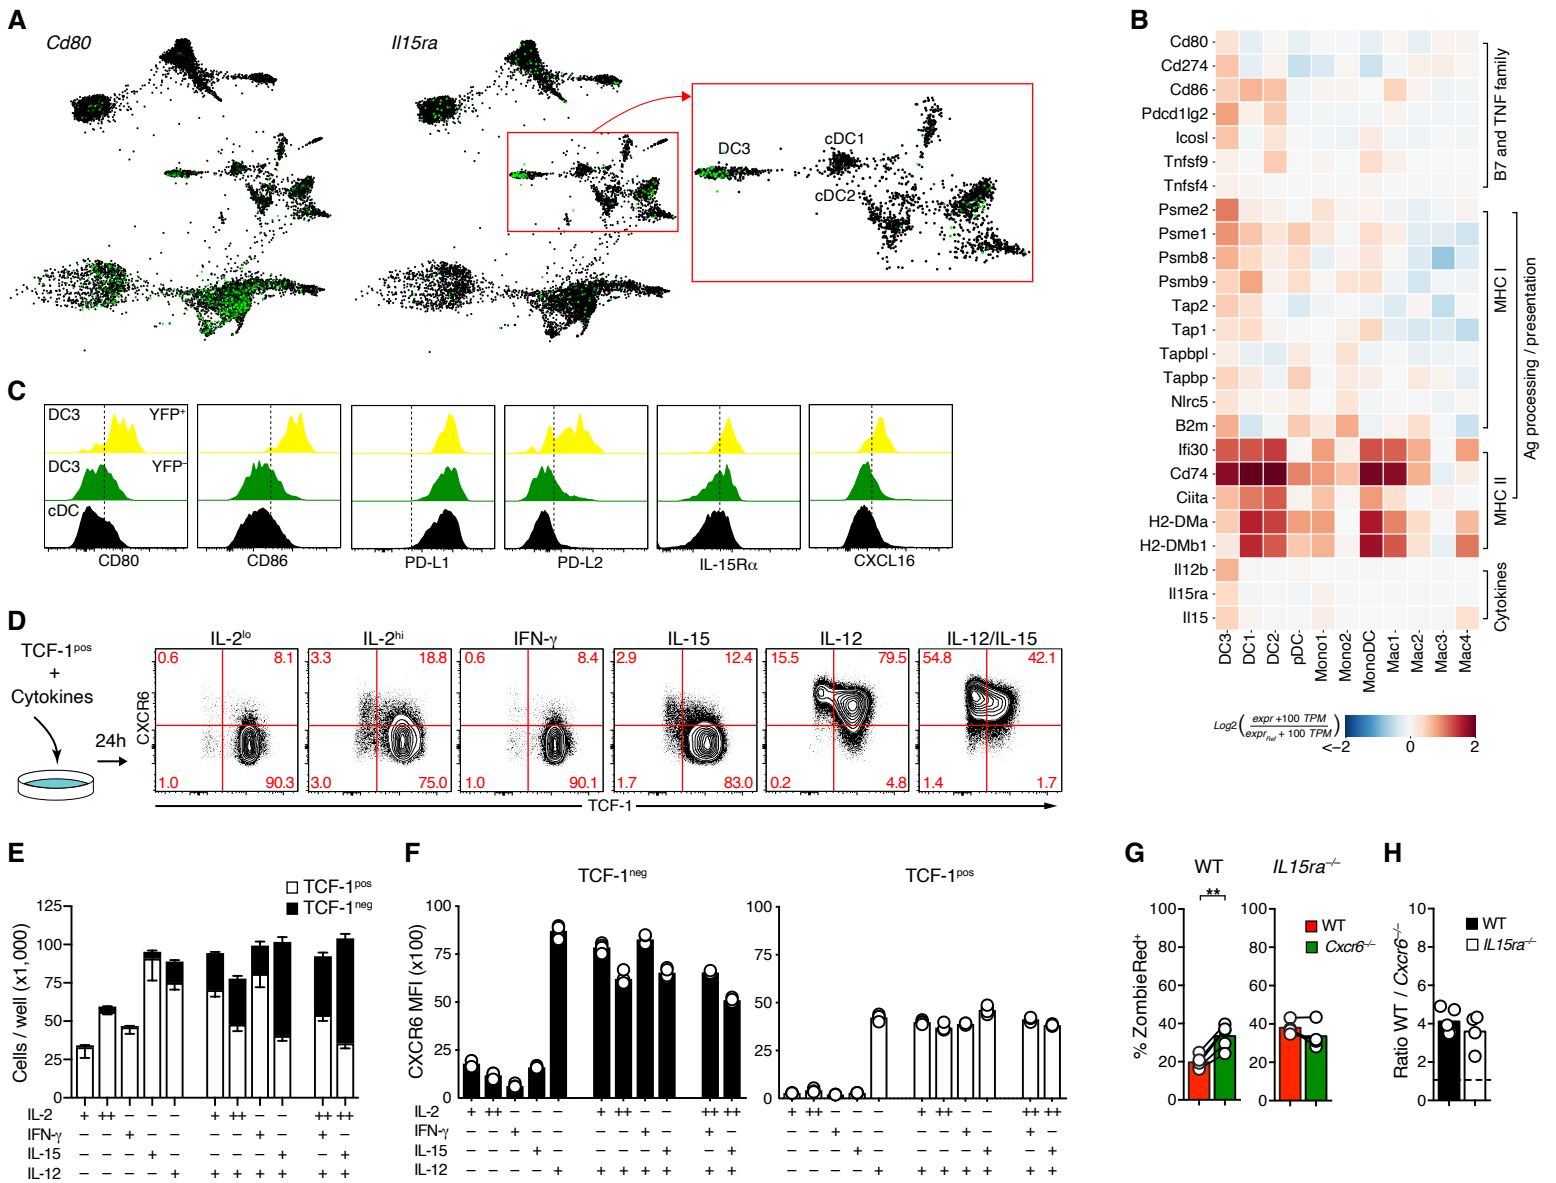

Figure S6

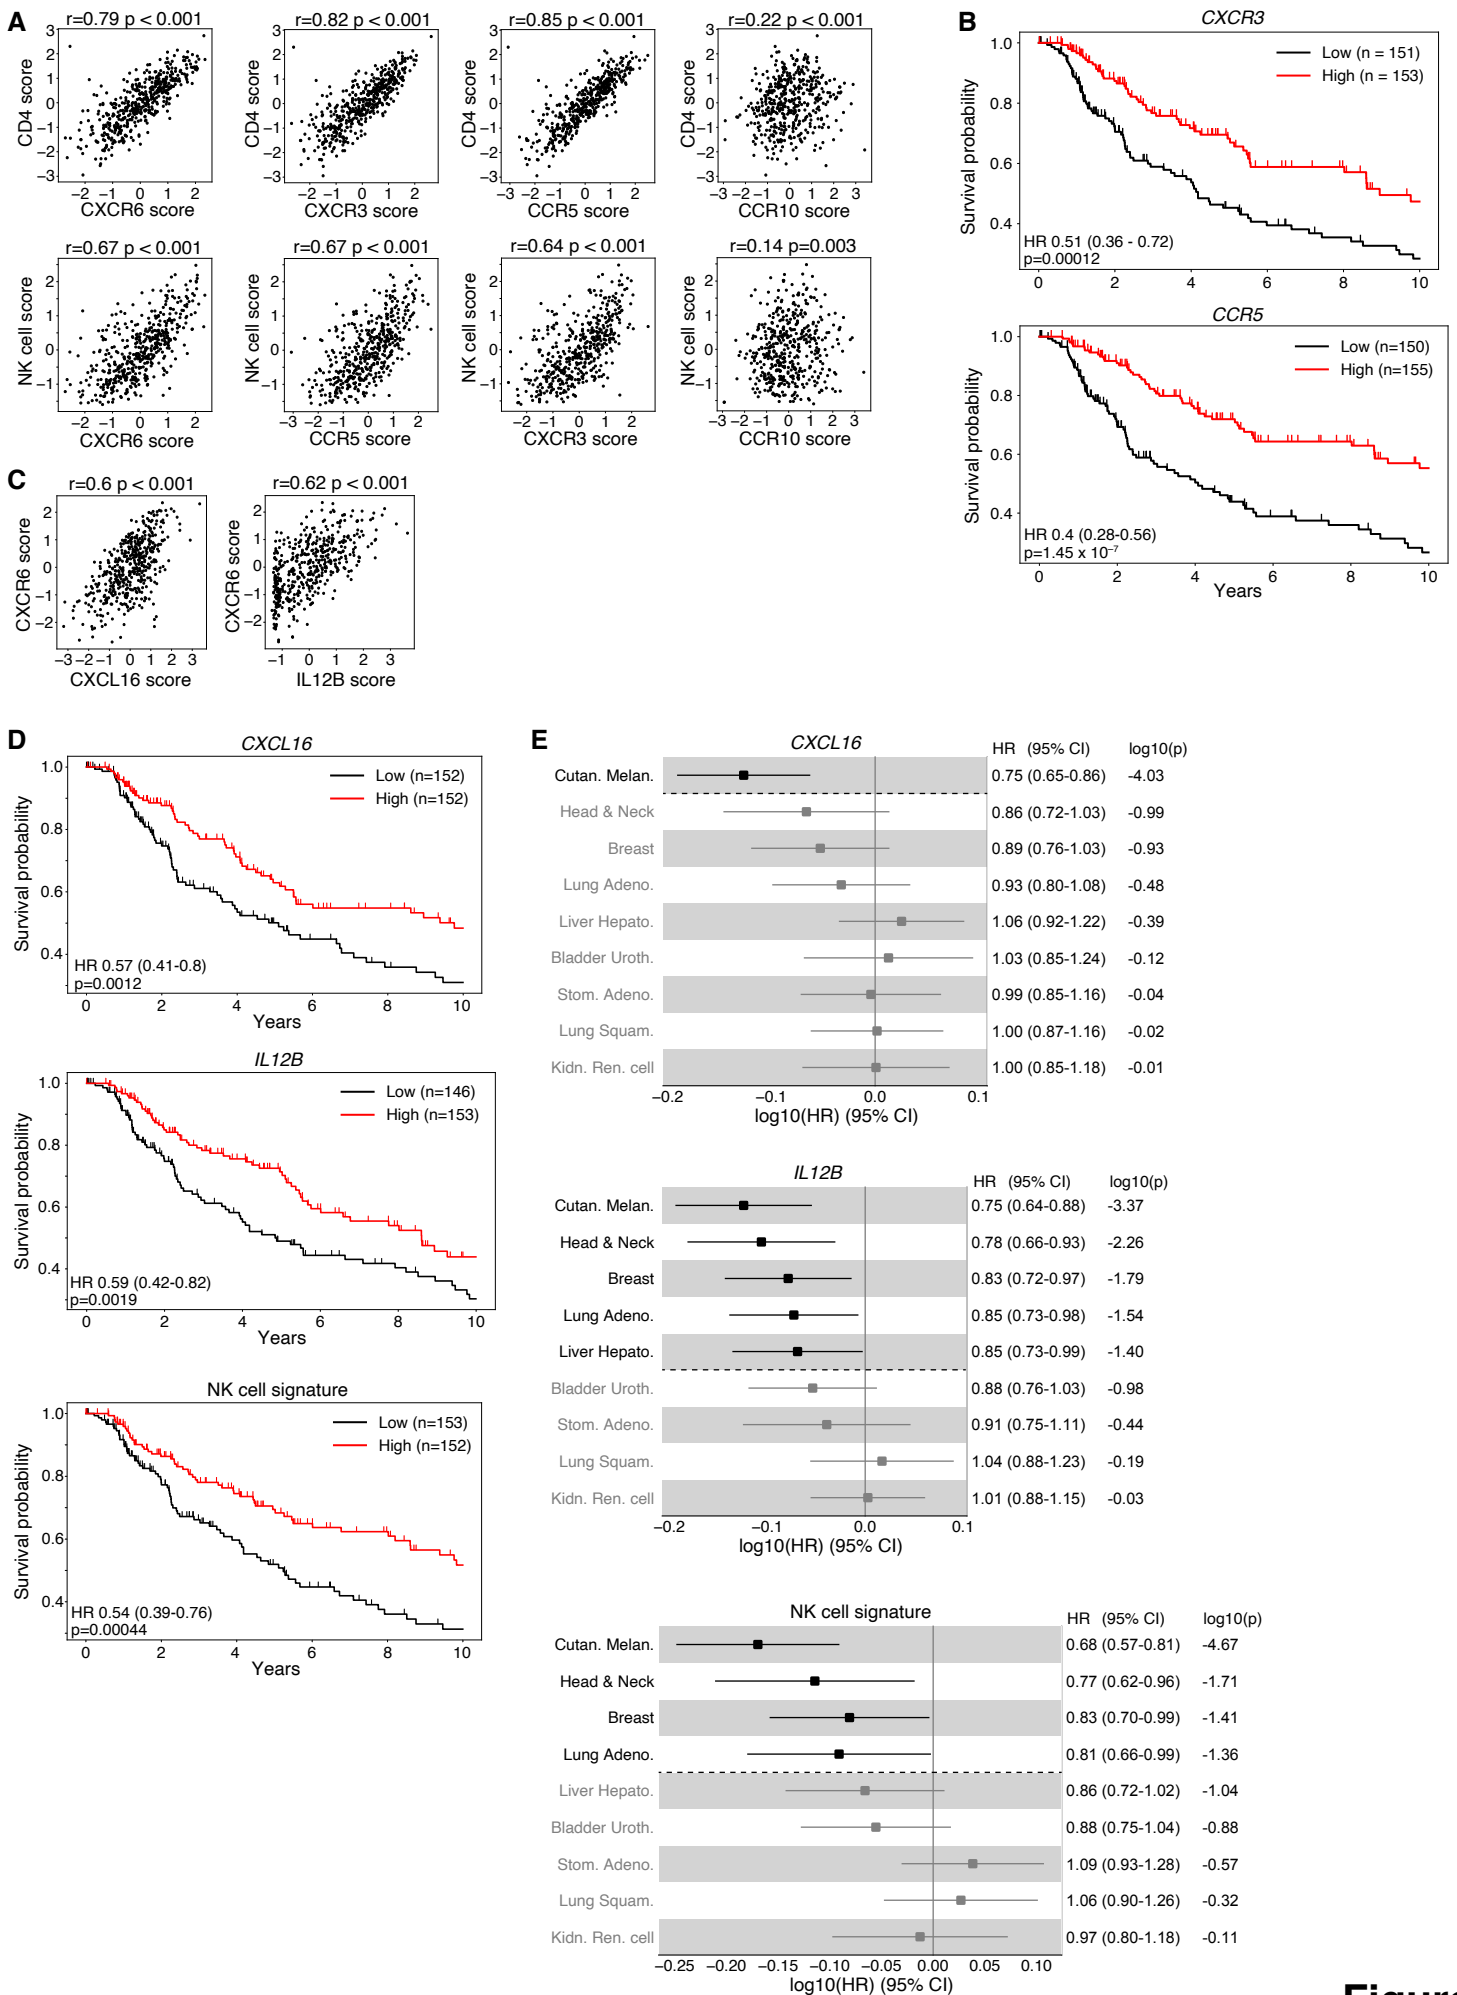

**Figure S7**
